# Supplementary material for: Associations of leisure time and occupational physical activity with tobacco smoking and dual use of e-cigarettes among adults – a representative cross-sectional survey in Germany
Source: Research Square preprint supplement (doi:10.21203/rs.3.rs-7434819/v1), 2025-09-16
Supplement: Supplementary file 1 [file 80e4143723fe25ca7e2e7c37.docx]

Sensitivity analysis by part-time and full-time paid employment data: main effects.

|  | **Current vs. never smokerß** | | **Ex vs. never smoker** | | **>20 cpd vs. <10 cpd#** | | **10-20 cpd vs. <10 cpd** | | **Dual use vs. single use**Ϯ | |
| --- | --- | --- | --- | --- | --- | --- | --- | --- | --- | --- |
|  | OR | 95% CI | OR | 95% CI | OR | 95% CI | OR | 95% CI | OR | 95% CI |
| **OPA**§ |  |  |  |  |  |  |  |  |  |  |
| very active | 1.60*** | 1.40; 1.81 | 1.17* | 1.01; 1.36 | 1.19 | 0.92; 1.55 | 1.11 | 0.87; 1.43 | 1.53** | 1.13; 2.09 |
| moderately active | 1.07 | 0.96; 1.18 | 1.00 | 0.89; 1.11 | 0.82 | 0.64; 1.04 | 1.11 | 0.90; 1.39 | 1.17 | 0.86; 1.58 |
| not active | 1 | | 1 | | 1 | | 1 | | 1 | |
|  |  |  |  |  |  |  |  |  |  |  |
| **LTPA**$ |  |  |  |  |  |  |  |  |  |  |
| very active | 0.58*** | 0.52; 0.65 | 1.04 | 0.90; 1.21 | 0.43*** | 0.32; 0.58 | 0.77 | 0.58; 1.01 | 1.05 | 0.76; 1.45 |
| moderately active | 0.54*** | 0.48; 0.61 | 1.02 | 0.90; 1.16 | 0.53*** | 0.40; 0.71 | 0.87 | 0.66; 1.13 | 0.59** | 0.41; 0.84 |
| low active | 0.58*** | 0.52; 0.65 | 0.92 | 0.81; 1.05 | 0.60*** | 0.47; 0.77 | 0.85 | 0.67; 1.07 | 0.60** | 0.44; 0.84 |
| not active | 1 | | 1 | | 1 | | 1 | | 1 | |

*§Occupational physical activity (OPA): very active (mostly heavy physical work or physically demanding activities), moderately active (mostly walking or moderately strenuous physical activities), not active (mostly sitting or standing=reference) $Leisure time physical activity (LTPA): very active (>300 min/week), moderately active (151-300 min/week), low active (1-150 min/week), not active (0 min/week= reference) # cigarettes smoked per day (cpd) refers to current daily tobacco smokers (<10=reference). Ϯdual use means tobacco cigarettes and e-cigarettes, single use (=reference) means only tobacco cigarettes ***significant result p< 0.001 ** p<0.01 *p>0.05.*

Sensitivity analysis by part-time and full-time paid employment data: interaction effects.

|  | **Current vs. never smokerß** | | **Ex vs. never smoker** | | **>20 cpd vs. <10 cpd#** | | **10-20 cpd vs. <10 cpd** | | **Dual use vs. single use**Ϯ | |
| --- | --- | --- | --- | --- | --- | --- | --- | --- | --- | --- |
|  | OR | 95% CI | OR | 95% CI | OR | 95% CI | OR | 95% CI | OR | 95% CI |
| **Interactions*&*** |  |  |  |  |  |  |  |  |  |  |
| OPA*LTPA | 0.84 | 0.67; 1.06 | 0.93 | 0.72; 1.21 | 0.60** | 0.44; 0.82 | 0.94 | 0.69; 1.27 | 1.17 | 0.79; 1.72 |
| OPA*No LTPA | 1.67*** | 1.28; 2.15 | 1.01 | 0.74; 1.36 | 1.12 | 0.85; 1.63 | 1.10 | 0.80; 1.52 | 1.43 | 0.97; 2.12 |
| No OPA* LTPA | 0.51*** | 0.41; 0.65 | 0.80 | 0.62; 1.03 | 0.51*** | 0.37; 0.71 | 0.76 | 0.56; 1.04 | 0.74 | 0.48; 1.12 |
| No OPA*No LTPA | 1 | | 1 | | 1 | | 1 | | 1 | |

*§Occupational physical activity (OPA): very active (mostly heavy physical work or physically demanding activities), moderately active (mostly walking or moderately strenuous physical activities), not active (mostly sitting or standing=reference) $Leisure time physical activity (LTPA): very active (>300 min/week), moderately active (151-300 min/week), low active (1-150 min/week), not active (0 min/week= reference) &OPA and LTPA are binary coded in either being physically active or inactive, No OPA*No LTPA=reference # cigarettes smoked per day (cpd) refers to current daily tobacco smokers (<10=reference). Ϯdual use means tobacco cigarettes and e-cigarettes, single use (=reference) means only tobacco cigarettes ***significant result p< 0.001 ** p<0.01 *p>0.05*

Sensitivity analysis for unweighted data: main effects.

|  | **Current vs. never smokerß** | | **Ex vs. never smoker** | | **>20 cpd vs. <10 cpd#** | | **10-20 cpd vs. <10 cpd** | | **Dual use vs. single use**Ϯ | |
| --- | --- | --- | --- | --- | --- | --- | --- | --- | --- | --- |
|  | OR | 95% CI | OR | 95% CI | OR | 95% CI | OR | 95% CI | OR | 95% CI |
| **OPA**§ |  |  |  |  |  |  |  |  |  |  |
| very active | 1.68*** | 1.47; 1.91 | 1.04 | 0.98; 1.06 | 1.60** | 1.17; 2.17 | 1.52* | 1.14; 2.02 | 1.22 | 0.86; 1.73 |
| moderately active | 1.09 | 1.00; 1.20 | 0.98 | 0.91; 1.06 | 1.12 | 0.89; 1.41 | 1.05 | 0.85; 1.29 | 0.95 | 0.70; 1.28 |
| not active | 1 | | 1 | | 1 | | 1 | | 1 | |
|  |  |  |  |  |  |  |  |  |  |  |
| **LTPA**$ |  |  |  |  |  |  |  |  |  |  |
| very active | 0.56*** | 0.49; 0.63 | 1.03 | 0.92; 1.16 | 0.30*** | 0.22; 0.41 | 0.53*** | 0.40; 0.70 | 1.08 | 0.75; 1.56 |
| moderately active | 0.50*** | 0.45; 0.56 | 0.93 | 0.84; 1.03 | 0.38*** | 0.28; 0.51 | 0.58*** | 0.45; 0.76 | 0.68* | 0.46; 0.99 |
| low active | 0.56*** | 0.50; 0.62 | 0.93 | 0.84; 1.02 | 0.45*** | 0.35; 0.58 | 0.61*** | 0.49; 0.78 | 0.87 | 0.63; 1.21 |
| not active | 1 | | 1 | | 1 | | 1 | | 1 | |

*§Occupational physical activity (OPA): very active (mostly heavy physical work or physically demanding activities), moderately active (mostly walking or moderately strenuous physical activities), not active (mostly sitting or standing=reference) $Leisure time physical activity (LTPA): very active (>300 min/week), moderately active (151-300 min/week), low active (1-150 min/week), not active (0 min/week= reference) # cigarettes smoked per day (cpd) refers to current daily tobacco smokers (<10=reference). Ϯdual use means tobacco cigarettes and e-cigarettes, single use (=reference) means only tobacco cigarettes ***significant result p< 0.001 ** p<0.01 *p>0.05.*

Sensitivity analysis for unweighted data: interaction effects.

|  | **Current vs. never smokerß** | | **Ex vs. never smoker** | | **>20 cpd vs. <10 cpd#** | | **10-20 cpd vs. <10 cpd** | | **Dual use vs. single use**Ϯ | |
| --- | --- | --- | --- | --- | --- | --- | --- | --- | --- | --- |
|  | OR | 95% CI | OR | 95% CI | OR | 95% CI | OR | 95% CI | OR | 95% CI |
| **Interactions*&*** |  |  |  |  |  |  |  |  |  |  |
| OPA*LTPA | 0.65*** | 0.52; 0.79 | 0.88 | 0.72; 1.07 | 0.46*** | 0.33; 0.62 | 0.63** | 0.47; 0.85 | 1.07 | 0.72; 1.60 |
| OPA*No LTPA | 1.30** | 1.03; 1.65 | 0.95 | 0.74; 1.20 | 1.07 | 0.76; 1.51 | 1.05 | 0.75; 1.46 | 1.15 | 0.75; 1.77 |
| No OPA* LTPA | 0.55*** | 0.45; 0.67 | 0.79* | 0.65; 0.95 | 0.30*** | 0.22; 0.42 | 0.52*** | 0.39; 0.70 | 1.03 | 0.69; 1.53 |
| No OPA*No LTPA | 1 | | 1 | | 1 | | 1 | | 1 | |

*§Occupational physical activity (OPA): very active (mostly heavy physical work or physically demanding activities), moderately active (mostly walking or moderately strenuous physical activities), not active (mostly sitting or standing=reference) $Leisure time physical activity (LTPA): very active (>300 min/week), moderately active (151-300 min/week), low active (1-150 min/week), not active (0 min/week= reference) &OPA and LTPA are binary coded in either being physically active or inactive, No OPA*No LTPA=reference # cigarettes smoked per day (cpd) refers to current daily tobacco smokers (<10=reference). Ϯdual use means tobacco cigarettes and e-cigarettes, single use (=reference) means only tobacco cigarettes ***significant result p< 0.001 ** p<0.01 *p>0.05*
